# Supplementary material for: A High-Throughput Size Exclusion Chromatography Method to Determine the Molecular Size Distribution of Meningococcal Polysaccharide Vaccine
Source: Int J Anal Chem. 2016 Sep 5;2016:9404068. doi: 10.1155/2016/9404068 (PMC5027369; doi:10.1155/2016/9404068)
Supplement: Supplementary file 1 — S1: The polysaccharide content of all fractions was calculated from the value of rocket height of samples & standards and standard's concentrations. S2: The total percentage of recovered polysaccharide for all serogroups was shown. [file 9404068.f1.zip]

Archive with 2 entries (2 files):
- S1.docx
- S2.docx
